# Supplementary material for: Yeast fermentation inspired Ca-alginate hydrogel membrane: lower transparency, hierarchical pore structure and higher hydrophobicity
Source: Royal Society of Chemistry journal article supplement (doi:10.1039/c7ra10904k), 2018-01-01
Supplement: c7ra10904k1.pdf [file c7ra10904k1.pdf]

## Supplementary Information

### **Yeast fermentation inspired Ca-alginate hydrogel membrane: lower transparency, hierarchical pore structure and higher hydrophobicity**

Lijuan Xing<sup>a</sup>, Zhigang Li<sup>a</sup>, Qingsong Zhang<sup>a\*</sup>, Yixuan Zhang<sup>a</sup>, Pengfei Liu<sup>b</sup>, Kailin Zhang<sup>c</sup>

<sup>a</sup>*State Key Laboratory of Separation Membranes and Membrane Processes, Tianjin Polytechnic University, Tianjin 300387, China*

<sup>b</sup>*School of Computer Science & Software Engineering, Tianjin Polytechnic University, Tianjin 300387, China*

<sup>c</sup>*College of Chemical and Environmental Engineering, Shandong University of Science and Technology, Tsingtao 266590, China*

\*Corresponding authors.

E-mail addresses: zqs8011@163.com (Q. Zhang). Tel: 8622-83955362

To investigate the existence of yeast cells, the ESEM micrographs of freeze-dried MIHM15 porous hydrogel membranes under different magnifications were shown in Fig. S1. It is seen that both micro and macro pores present in the MIHM15 hydrogel membrane. Under low magnification, millimeter-sized pores are visible and small micro/nanometer-sized pores can also be observed under high magnification. Furthermore, Fig. S1d shows that massive dead yeast cells ranging from 2 to 4.5  $\mu\text{m}$  adhere to the pore walls and disperse in entire network, which is a clear evidence of low transmittance as shown in Fig. 1e. From a macroscopic view, the homogeneous Ca-alginate network structure becomes more complicated owing to the yeast fermentation. These values are much higher than those of modified Ca-alginate hydrogels previously reported in the literature, e.g., 500  $\mu\text{m}$  for cellulose-alginate hydrogels with 3 wt% SA loading,<sup>1</sup> 250  $\mu\text{m}$  for gelatin-alginate-polyacrylamide hydrogels with 2 wt% SA loading<sup>2</sup> and 105  $\mu\text{m}$  for sericin-SA IPN hydrogel with 2 wt% SA,<sup>3</sup> respectively. Our data indicates that MIHM hydrogel membranes exhibit comparatively large pore, which is considered to be due to a great deal of  $\text{CO}_2$  production by yeast fermentation.

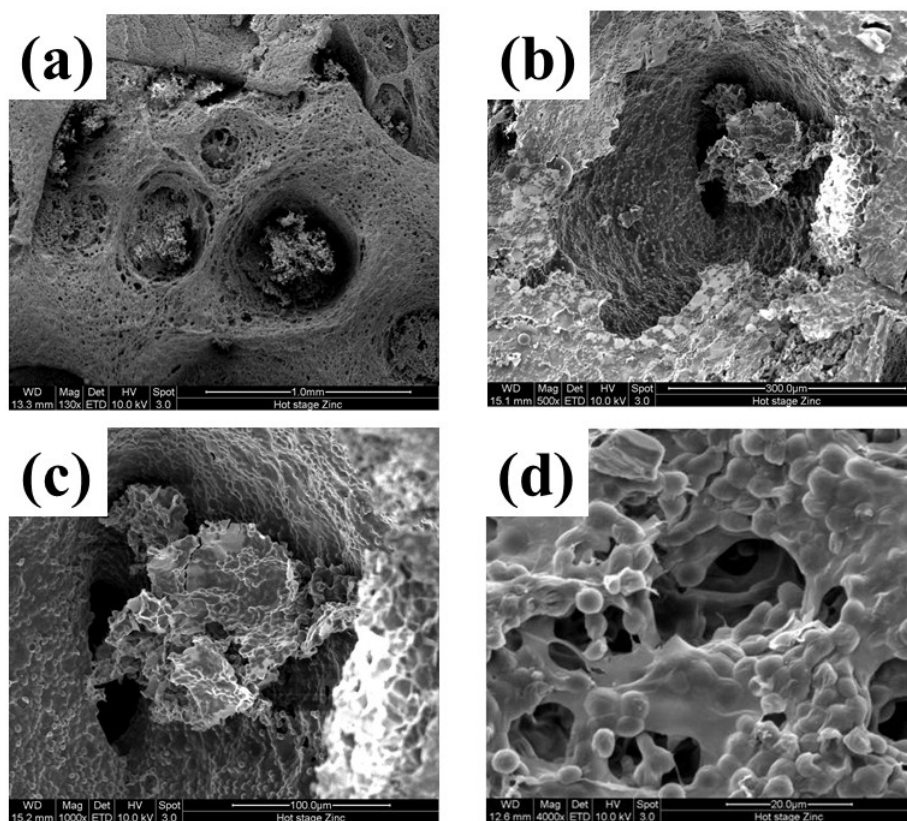

**Fig.S1.** ESEM images of MIHM15 hydrogel membranes under different magnifications. (a) 130, (b) 500, (c) 1000 and (d) 4000. Massive dead yeast cells ranging from 2 to 4.5  $\mu\text{m}$  adhere to the pore walls and disperse in entire network.

The formation mechanism of porous MIHM samples involved into cross-linking of SA/CaCl<sub>2</sub> and fermentation process of yeast/glucose, as shown in Fig.S2. In terms of the cross-linking action between SA and CaCl<sub>2</sub>, Soazo et al. pointed out that SA were cross-linked when Ca<sup>2+</sup> interacted with blocks of guluronic residues.<sup>4</sup> According to the “egg-box” model, two contiguous and biaxially linked guluronic residues form a cavity that acts as a binding site for calcium ions. Ca<sup>2+</sup> binding induces chain-chain associations forming stable junction zones of dimmers and lateral interactions. As a result, Ca-alginate hydrogels are prepared. On the other hand, during the polymerization, CO<sub>2</sub> is produced by yeast fermentation and bubbles dissipate into the air after across the reaction solution. The generated CO<sub>2</sub> gas bubbles rise continuously

and are blocked by the cross-linked network structure of SA/CaCl<sub>2</sub> hydrogels, which leads to the formation of porous structures.

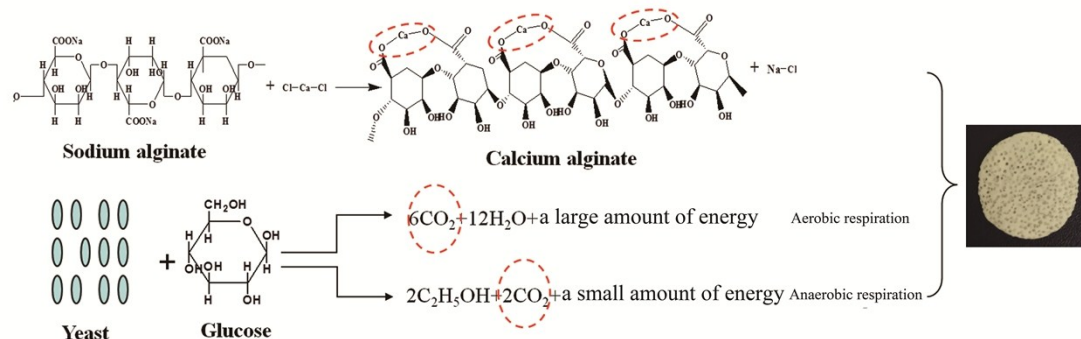

**Fig.S2** Pore formation mechanism of MIHM using yeast/glucose as porogen. The formation mechanism of porous MIHM samples involves cross-linking of SA/CaCl<sub>2</sub> and fermentation process of yeast/glucose.

## References

- [1] C.Chang, B.Duan and L.Zhang, *Polymer*, 2009, **50**, 5467-5473.
- [2] I.C.Stancu, A.Lungu, D.M.Dragusin, E.Vasile, C.Damian and H.Iovu, *Soft Mater.*, 2013, **11**, 384-393.
- [3] Y.S.Zhang, J.Liu, L.Huang, Z.Wang and L.Wang, *Sci. Rep.*, 2015, **5**, 1-13.
- [4] M. Soazo, G. Báez, A. Barboza, P.A. Busti, A. Rubiolo, R. Verdini and N.J. Delorenzi, *Food Hydrocolloids*, 2015, **51**, 193-199.
